1 **Accumulation of mutations in genes associated with sexual reproduction contributed to**  
2 **the domestication of a vegetatively propagated staple crop, enset.**

3

4 Kiflu Gebramicael Tesfamicael<sup>1,2</sup>, Endale Gebre<sup>3</sup>, Timothy J March<sup>2</sup>, Beata Sznajder<sup>2</sup>, Diane  
5 E. Mather<sup>2</sup>, Carlos Marcelino Rodriguez Lopez<sup>1,2\*</sup>

6 *Kiflu Gebramicael Tesfamicael; email: [Kiflu.tesfamicael@uky.edu](mailto:Kiflu.tesfamicael@uky.edu)*

7 *Endale Gebre, email: [endale\\_gebre@yahoo.com](mailto:endale_gebre@yahoo.com)*

8 *Timothy J March, email: [timothy.march@adelaide.edu.au](mailto:timothy.march@adelaide.edu.au)*

9 *Beata Sznajder, email: [beata.sznajder@adelaide.edu.au](mailto:beata.sznajder@adelaide.edu.au)*

10 *Diane E. Mather, email: [Diane.mather@adelaide.edu.au](mailto:Diane.mather@adelaide.edu.au)*

11 *Carlos Marcelino Rodriguez Lopez email: [carlos.rodriguezlopez@uky.edu](mailto:carlos.rodriguezlopez@uky.edu)*

12 <sup>1</sup>*Environmental Epigenetics and Genetics Group, Department of Horticulture, College of*  
13 *Agriculture, Food and Environment, University of Kentucky, Lexington, KY 40546, USA*

14 <sup>2</sup>*School of Agriculture, Food & Wine, The University of Adelaide, Waite Campus, Glen*  
15 *Osmond, South Australia, Australia*

16 <sup>3</sup>*Endale Gebre (PhD), Policy Study Institute, P.o.Box: 2479, Addis Ababa, Ethiopia*

17 *\*Correspondent author*

18

19

20

21

22

23 **Abstract**

24 Enset (*Ensete ventricosum* (Welw.) Cheesman) is a drought tolerant, vegetatively propagated  
25 crop that was domesticated in Ethiopia. It is a staple food for more than 20 million people in  
26 Ethiopia. Despite its current importance and immense potential, enset is among the most  
27 genetically understudied and underexploited food crops. We collected 230 enset wild and  
28 cultivated accessions across the main enset producing regions in Ethiopia and applied amplified  
29 fragment length polymorphism and genotype by sequencing (GBS) methods to these  
30 accessions. Wild and cultivated accessions were clearly separated from each other, with 89  
31 genes found to harbour SNPs that separated wild from cultivated accessions. Among these, 17  
32 genes are thought to be involved in flower initiation and seed development. Among cultivated  
33 accessions, differentiation was mostly associated with geographical location and with  
34 proximity to wild populations. Our results indicate that vegetative propagation of elite clones  
35 has favoured capacity for vegetative growth at the expense of capacity for sexual reproduction.  
36 This is consistent with previous reports that cultivated enset tends to produce non-viable seeds  
37 and flowers less frequent than wild enset.

38 Keywords: GBS, cultivated enset, wild enset, SNP, Genotyping By Sequencing, MSAP,  
39 population structure, domestication

40

## 41 **Introduction**

42 Plant domestication and breeding can alter and shrink genetic diversity (Miller & Schaal, 2006;  
43 Martínez-Ainsworth & Tenaillon, 2016). In some crop species, this entails a shift from sexual  
44 to vegetative propagation (Silvertown, 2008). Enset (*Ensete ventricosum* Welw.) Cheesman),  
45 often referred as false banana) is a hapaxanth diploid ( $2n=18$ ) plant (Cheesman, 1947) that  
46 belongs to the Musaceae family (Shumbulo et al., 2012). In the wild, enset propagates by seed  
47 (Haile et al. 2014). The native distribution of wild enset encompasses the eastern coast Africa,  
48 from South Africa to Ethiopia, and extends west into the Congo (Borrell et al., 2019). In  
49 Ethiopia, which is considered to be the centre of origin of *E. ventricosum*, wild enset grows  
50 mainly along riversides and deep forest, extending into cultivated land and gardens in some  
51 regions (Olango *et al.*, 2015; Eshetae *et al.*, 2019).

52

53 Despite the wide distribution of wild enset, enset has been domesticated only in the Ethiopian  
54 highlands (Borrell et al., 2019; Heslop-Harrison et al., 2019) and it is now grown as a crop  
55 mainly in the southern and south-western parts of Ethiopia (Olango *et al.*, 2014; Guzzon &  
56 Müller, 2016). In these regions, cultivated enset is propagated vegetatively from suckers.  
57 Ethiopia maintains more than 600 accessions of cultivated enset *via* vegetative propagation  
58 (Harrison et al., 2014).

59

60 Due to its importance for food security in Ethiopia (Yemataw *et al.*, 2014; Guzzon & Müller,  
61 2016; Yemata, 2020), enset has been called “the tree against hunger” (Brandt et al., 1997a).  
62 Enset is known for its high yield, drought tolerance, high shade potential, broad agro-ecological  
63 distribution and long storage capacity (Brandt et al., 1997b; Quinlan et al., 2014). Despite these  
64 positive features, enset has received little research attention (Borrell et al., 2019) and its genetic

65 diversity is under threat from diseases such as bacterial wilt and from pressures associated with  
66 human population growth (Birmeta, 2004; Guzzon & Müller, 2016).

67

68 Genetic analysis of intraspecific variation in enset has mainly relied upon data for ‘anonymous’  
69 molecular markers, such as amplified fragment length polymorphisms (AFLP) (Tsegaye &  
70 Struik, 2002), random amplified polymorphic DNA (RAPD) (Birmeta et al., 2004), inter simple  
71 sequence repeats (ISSR) (Tobiaw & Bekele, 2013) and microsatellites (simple sequence repeat  
72 (SSR) polymorphisms (Getachew *et al.*, 2014; Olango *et al.*, 2015; Gerura *et al.*, 2019). Given  
73 that enset is vegetatively propagated, genetic divergence among cultivars may be minimal  
74 (McKey et al., 2010) and could be difficult to detect using these marker types.

75

76 Here, we report on the application of both AFLP and next-generation sequencing (NGS)  
77 methods to 230 enset accessions (192 cultivated and 38 wild). Data collected using these  
78 methods were used to investigate population structure of cultivated and wild enset accessions  
79 and to identify signatures of selection and domestication within the enset genome. To our  
80 knowledge, this is the first application of NGS to a large number of accessions of wild and  
81 cultivated enset collected from a large geographic area.

82

## 83 **Results**

### 84 **AFLP analysis**

85 Based on the analysis of presence/absence data for 111 AFLP amplicons with lengths ranging  
86 from 51 bp to 350 bp, the heterozygosity and Shannon’s Index were higher for cultivated  
87 accessions ( $0.193\pm 0.02$  and  $0.298\pm 0.029$ ) than for wild accessions ( $0.186\pm 0.02$  and  
88  $0.285\pm 0.029$ ). However, the average genetic distance between cultivated accessions was lower  
89 ( $0.026\pm 0.002$ ) than between wild accessions ( $0.047\pm 0.007$ ). The average percentage of

90 polymorphic peaks for cultivated and wild accessions were  $45.75\% \pm 3.25\%$  and  $41.7\% \pm 6.18$   
91 respectively.

92

93 Analysis of molecular variance (AMOVA) showed that that the majority (87-89%) of enset  
94 genetic variability is explained by within-region differences, while 11-13% can be attributed  
95 to variation between regions (Table 2). Principal coordinate analysis (PCoA) using AFLP  
96 markers showed that wild and cultivated enset accessions formed clusters with considerable  
97 overlapping of individuals from the two groups (Fig. 2a). Mantel test analysis showed  
98 significant correlation ( $r = 0.7$ ;  $P < 0.0001$ ) between genetic and geographic distances among  
99 cultivated and wild enset accessions (Supplementary Fig.1).

100

### 101 **SNP discovery and analysis**

102 Genotyping by sequencing of 149 (125 cultivated and 24 wild) enset accessions generated a  
103 total of 569,324,179 reads with 74 bp length and 50% of GC content. Eight samples were  
104 removed because of high SNP missing ratio, leaving 141 samples (120 cultivated and 21 wild)  
105 for analysis.

106

107 A total of 3,743,487 tags passed mapping criteria when physically mapped to the *Musa*  
108 *malaccensis* (wild banana) genome. This reference genome based SNP calling generated  
109 22,884 SNPs showing locus coverage lower than 0.1 and minor allele frequency lower than  
110 0.01. After filtering to remove SNPs with missing value greater than 20% and missing ratio  
111 greater than 30%, 5169 high quality SNPs remained. Of these, 4282 SNPs (83%) physically  
112 mapped to one of the 11 chromosomes of the *Musa malaccensis* genome and the remaining  
113 887 SNPs were physically mapped to *Musa malaccensis* genome scaffolds (Table 3). The  
114 number SNPs per chromosome ranged from 251 in chromosome 2 to 465 in chromosome 4

115 (Table 3), with an average 389 SNPs per chromosome. The highest density of SNPs was  
116 detected on chromosome 4 (65.05 kb/SNP) and the lowest on chromosome 10 (91.5 kb/SNP).  
117 A/G transitions presented the highest frequency (29.06%) followed by C/T transitions  
118 (28.03%) and A/C transversions (11.30%) (Table 5).

119

## 120 **Genetic relatedness and population structure of cultivated and wild enset accessions**

121 PCA using the 5169 SNP markers indicated that all but one of the wild enset accessions  
122 clustered separately from the cultivated enset accessions (Fig.2b). UPGMA based phylogenetic  
123 tree (Fig.3) showed that the cultivated and wild enset accessions formed two clearly separated  
124 clades. The cultivated enset accessions formed multiple subclades within the cultivated enset  
125 population.

126

127 DAPC analysis showed a clear separation of enset accessions into three clusters (Fig.4a).  
128 Cluster 1 was comprised of 24 cultivated accessions and one wild accession. Among the 24  
129 cultivated accessions in this clade, 17 accessions (71%) were collected from areas in which  
130 only cultivated enset was found. Cluster 2 contained 96 cultivated accessions, 67% of which  
131 were collected from areas which have both cultivated and wild enset accessions. Cluster 3  
132 contained only wild enset accessions. STRUCTURE analysis with the  $\Delta K$  method indicated  
133 the most informative number of subpopulations is two ( $K = 2$ ) (Fig. 5b). Individuals were  
134 considered part of a cluster when the probability of membership was 0.5 or greater. With  $K=2$ ,  
135 46 cultivated enset accessions clustered together with 20 wild enset accessions. With  $K=3$ , the  
136 pattern was similar (Fig.5a). At higher values of  $K$ , wild accessions continued to group together  
137 and the cultivated accessions grouped into three main clusters.

138

139

## 140 **Genetic diversity of cultivated and wild enset**

141 The average PIC and gene diversity were similar for cultivated and wild accessions. Cultivated  
142 enset accessions exhibited higher heterozygosity than wild accessions, while the average major  
143 allele frequency was higher for cultivated than for wild accessions (Table 4). The average  
144 genetic distances and average  $F_{st}$  values among cultivated and wild accessions were  
145  $0.33\pm 0.001$ (SE) and  $0.11\pm 0.005$  (SE), respectively.

146

147 Analysis of genome-regional patterns of nucleotide diversity using 500 kb non-overlapping  
148 sliding windows showed that the average nucleotide diversity was higher in wild enset  
149 accessions ( $0.32\pm 0.005$  (SE)) than in cultivated enset accessions ( $0.27\pm 0.006$  (SE)) (Fig.6).  
150 Calculation of the degree of diversification ( $F_{st}$ ) between cultivated and wild enset accessions  
151 identified a total of 29 genomic subregions with high degree of diversification ( $F_{st}>0.2$ ) and 76  
152 genomic subregions with low  $F_{st}$  ( $F_{st}<0.02$ ) (Fig.6). Chromosomes 3, 5 and 10 presented the  
153 highest number of genomic subregions with high  $F_{st}$ . On the other hand, chromosome 1  
154 presented the highest number of low  $F_{st}$  genomic subregions (11 subregions), while  
155 chromosomes 2, 3 and 5 showed the lowest number of low  $F_{st}$  genomic subregions (4  
156 subregions).

157

## 158 **Genomic regions under selection pressure**

159 The genome scan approach (LOSITAN-based  $F_{st}$ -outlier detection method) implemented in  
160 this study identified 158 (2.56%) SNPs which frequency was significantly different between  
161 cultivated and wild enset populations which are dispersed throughout the 11 chromosomes of  
162 the wild banana reference genome (Fig. 7). Chromosome 3 and 10 harbour highest number of  
163 outlier SNPs (16 outlier SNPs each). Chromosome 1 contains the lowest number of outlier  
164 SNPs (4 SNPs), despite containing the highest number of SNP markers. Mapping of outlier

165 SNPs to the reference genome (*Musa acuminata subsp. malaccensis*) genome identified 89  
166 genes containing one or more SNPs within their protein coding region (Supplementary Table  
167 4). Of these, 19 genes were found to be associated to sexual reproduction traits, i.e. flowering  
168 (8 genes), seed development and germination (9 genes) or domestication (2 genes)  
169 (Supplementary Table 6). The function of these genes were annotated based on comparative  
170 genomics (one gene), deduced from protein containing domains as putative function (five  
171 genes) and experimentally validated (14 genes) in other plants such as *Arabidopsis thaliana*,  
172 rice, soybean and tomato.

173

## 174 **Discussion**

### 175 **Genetic diversity of enset in Ethiopia**

176 The results presented here indicate that cultivated and wild enset accessions exhibit similar  
177 gene diversity and polymorphic information content (PIC) (Table 4). This is similar to what  
178 has been reported based on SSR marker analysis of enset genetic diversity (Gerura *et al.*, 2019),  
179 but differs from what has been reported by Olango *et al.* (2015), which reported that higher  
180 gene diversity in cultivated enset population (0.59) than wild enset population (0.40), but  
181 similar heterozygosity for cultivated and wild enset populations (0.5). The genetic diversity for  
182 both cultivated and wild enset reported in the current study (Table 4) is lower than previous  
183 enset genetic diversity studies conducted using SSR markers (Getachew *et al.*, 2014; Olango *et al.*,  
184 2015; Gerura *et al.*, 2019). These differences and discrepancies might be due to the nature  
185 of the different types of markers used. SSRs and microsatellite are multi-allelic and are more  
186 polymorphic than SNP markers, which are usually bi-allelic. The genetic diversity detected  
187 here for enset is higher than what has been reported for some other vegetatively propagated  
188 plants such as Cassava (de Albuquerque *et al.*, 2018; Kamanda *et al.*, 2020), and out-crossing



189 plants such as sunflower (Mandel et al., 2011) but lower what has been reported for Japonica  
190 rice (Becerra et al., 2017).

191

192 Our observations that cultivated ensets exhibited higher heterozygosity and Shannon's Index  
193 than wild enset resemble what have been reported for enset based on SSR markers study  
194 (Gerura *et al.*, 2019) and for other plant species, including *Camellia sinensis* (Yang et al., 2016)  
195 and *C. taliensis* (Zhao et al., 2014). The high heterozygosity of cultivated enset might be due  
196 to vegetative propagation maintaining heterozygosity across clonal generations. In addition,  
197 the wild enset habitat has been sharply declining in Ethiopia because of population growth and  
198 deforestation (Birmeta et al., 2004; Olango et al., 2015). This reduction in effective population  
199 size might have contributed to the observed lower heterozygosity due to the increase of chances  
200 of inbreeding in wild enset populations. However, genetic distances were greater among wild  
201 accessions than among cultivated accessions, possibly because wild populations remained  
202 isolated by distance or geographical barriers (Tobiaw & Bekele, 2013), while cultivated  
203 materials were more readily transferred between regions through regular long-distance  
204 accessions exchange between farmers (Brimata et al., 2020). Limited genetic distances among  
205 cultivated enset accessions could also be due to recent separation (fragmentation) of the  
206 varieties, without sufficient evolutionary time to generate variation (Burgos-Hernández et al.,  
207 2013).

208

### 209 **Population structure and genetic relationship between cultivated and wild enset** 210 **accessions in Ethiopia**

211 PCA and phylogenetic analysis revealed that cultivated and wild enset accessions separated  
212 into genetically distinct clusters despite being morphologically similar members of the same  
213 taxonomic species. This indicates that cultivated enset accessions has been domesticated from

214 a limited number of wild progenitors (Brimeta et al.,2004). It is also possible that currently  
215 cultivated enset and the currently available wild enset in Ethiopia originated from different  
216 ancestral materials. Bayesian clustering program STRUCTURE indicated that cultivated  
217 population grouped into three clusters and this is similar to previous SSR marker based enset  
218 genetic diversity study (Olango *et al.*, 2015). The genetic sub-clustering within cultivated enset  
219 corresponds with geographical distance between the accessions and proximity to wild enset.  
220 Cultivated enset accessions collected from areas where wild enset grows showed higher  
221 admixture and weaker clustering than those collected from areas where wild enset does not  
222 grow. Some cultivated accessions clustered with wild accessions, possibly indicating recent  
223 introgression of wild enset into farming systems. In the Omo region, particularly in the Ari  
224 sub-region, wild enset growing in gardens have been adopted by farmers as a cultivated crop  
225 and propagated (Shigeta, 1990; Hildebrand, 2001a). Thus, multiple domestication events  
226 and/or frequent introgression from wild enset could explain the high genetic diversity and  
227 overlapping spatial distributions of wild and cultivated enset (Borrell et al., 2019). Mantel test  
228 showed significant correlation ( $r=0.7$ ,  $P=0.0001$ ) between genetic and geographic distances  
229 separating wild and cultivated populations. Our results support Olango *et al* (2015) and Brimeta  
230 *et al* (2004) reports of a limited possibility of gene flow due to the natural distribution of wild  
231 enset and farming management.

232

### 233 **Loci under selection signature**

234 Improved understanding of the genetic adaption of enset could facilitate genetic improvement.  
235  $F_{st}$  outlier tests for detecting extreme allele frequency differentiation can detect genomic  
236 regions that have evolved under adaptation and selection (Beaumont & Balding, 2004;  
237 Lotterhos & Whitlock, 2014). Here, application of an  $F_{st}$  outlier test identified 158 outlier SNP  
238 markers that show significant ( $P<0.01$ ) genetic differentiation between cultivated and wild

239 enset. Mapping of these outlier markers to the diploid banana genome led to the identification  
240 of 89 genes under selection during enset domestication. 19.1% of these genes were found to be  
241 related to the regulation of flowering (Zhong & Ye, 2004; Gunesequera *et al.*, 2007; Ishida *et*  
242 *al.*, 2008; Uehara *et al.*, 2019; Kang *et al.*, 2020), or seed development (Swain *et al.*, 2005;  
243 Wen *et al.*, 2008; Li & Li, 2014; Ma *et al.*, 2018). Interestingly, another 2.3% of the genes  
244 found to be under selection have been previously associated to domestication in other species  
245 (Chakrabarti *et al.*, 2013; Jan *et al.*, 2013; Li *et al.*, 2017). Flowering and seed development  
246 are important characteristics that differentiate cultivated and wild enset (Borrell *et al.*, 2019).  
247 Wild enset flowers more frequently and has larger flowers (mean basal girth 186cm) than  
248 cultivated enset (mean basal girth 106cm) (Shigeta, 1990; Hildebrand, 2001b). Wild enset is  
249 highly prolific, producing thousands of large (about 12 mm diameter) hard black seeds, while  
250 cultivated enset plants bear fewer seeds, which are small (3 mm), soft, pale and incompletely  
251 developed (Hildebrand, 2001b). It has been previously suggested that these traits could be due  
252 to reduced fitness resulting from a subsequent selection and domestication bottleneck (Heslop-  
253 Harrison *et al.*, 2019). The proportion of genes found to be under selection in cultivated enset,  
254 certainly indicate that selection associated to domestication could be the driver of those traits.  
255  
256 In addition, the calculation of degree of diversification ( $F_{st}$ ) between cultivated and wild enset  
257 accessions enabled the identification of genomic subregions (500 kb non-overlapping) with  
258 high ( $F_{st} > 0.2$ ) degree of diversification (Fig 6). Genomic subregions with high  $F_{st}$  may contain  
259 or associated to potential genes that are related to plant domestication and adaptations, and  
260 provide an indication of the functional genes involved (Lam *et al.*, 2010). In the current study,  
261  $F_{st}$  outlier based scan for candidate genes under putative selection and adaptation has found  
262 promising results and is an important step forward to further studies on gene mapping and  
263 identification, and designing enset breeding program. to better understand enset genome and

264 use our result, it is necessary to conduct further gene mapping and genome-wide association  
265 studies with large sample size covering all the enset producing regions of Ethiopia.

266

## 267 **Materials and methods**

### 268 **Study area**

269 Samples were collected from six of the major enset producing regions in Ethiopia: Dawro,  
270 Guragie, Keffa, South Omo, Sheka and Sidama (Fig.1). Within each of these regions, samples  
271 were collected from subregions and from two or three districts within each subregion (Table  
272 1). Within each district, samples of domesticated enset were collected from five to ten  
273 households, selected based on recommendations from local agricultural extension experts.  
274 Samples of wild enset were collected around farming areas, along riversides and in deep  
275 forests. For each sampling location, latitude and longitude (degrees, minutes, seconds) were  
276 collected using GPS essentials mobile app ([https://downloads.tomsguide.com/GPS-](https://downloads.tomsguide.com/GPS-Essentials,0301-49666.html)  
277 [Essentials,0301-49666.html](https://downloads.tomsguide.com/GPS-Essentials,0301-49666.html)) and then transformed to standard Universal Tranverse Mercator  
278 coordinates (UTM) using a geographic unit converter  
279 (<http://www.rcn.montana.edu/Resources/Converter.aspx>) (Supplementary Table 1).

280

### 281 **Sample collection and DNA extraction**

282 Leaf samples were collected from 230 (192 cultivated and 38 wild) enset plants, each of which  
283 was between one and two years old (based on the farmer's information) (Supplementary Table  
284 1). Each sample consisted of a 5 cm \* 5 cm fragments of the leaf blade of the most recently  
285 unfurled leaf. Each sample was placed in a 50 ml tube and stored on ice during transportation,  
286 then stored at -80 °C until DNA extraction. Each subsample (80-90 mg) were milled using a  
287 mortar and pestle immersed in liquid nitrogen. DNA extractions were performed using DNeasy  
288 Plant Mini Kits (Qiagene Inc.) according to the manufacturer's instructions. DNA

289 concentration was measured using the QuantiFluor<sup>(R)</sup>dsDNA System<sup>(a)</sup> (Promega, USA)  
290 following manufacturer's instructions, then adjusted to 20 ng/μl using molecular biology grade  
291 water (Sigma).

292

### 293 **Amplified Fragment Length Polymorphism (AFLP) preparation and analysis**

294 AFLP reactions (Vos *et al.*, 1995) were performed for all 230 samples using a modification of  
295 the protocol described by López *et al.* (2012). Briefly, samples containing 55 ng of genomic  
296 DNA were enzymatically digested in a 12.5 reaction volume containing *MseI*, *EcoRI* (NEB)  
297 and ligated to *MseI* and *EcoRI* adaptors (Supplementary Table 4) at 37° C for 2 h in a T100<sup>TM</sup>  
298 Thermal cycler (*Bio-Rad* Laboratories, Hercules, CA). Success of the digestion/ligation  
299 reaction was confirmed on 1.5% of agarose gel electrophoresis. Pre-selective PCR  
300 amplification was carried out using primers containing a 3' selective nucleotide (i.e., *EcoRI*=A  
301 and *MseI*=C). Selective amplification was then conducted using a primer combination with  
302 three selective nucleotides at the 3' ends (*EcoRI*=ACG) and *MseI*=CAA). Selective bases were  
303 chosen according to previous work on enset (Negash *et al.*, 2002). PCR products were separated  
304 using Applied Biosystems 3130/3130xl Genetic Analysers (Applied Biosystems Life  
305 Technologies).

306

307 AFLP profiles were analysed using GeneMapper<sup>®</sup> Software v4.0. Clear and unambiguous  
308 polymorphisms were considered and were scored on a presence/absence basis for each marker.  
309 Clearly polymorphic peaks were verified manually and scored as present (1) or absent (0) for  
310 each sample. The level of AFLP polymorphism and genetic diversity across enset accessions  
311 were examined using GenAlEx 6.502 (Peakall & Smouse, 2012) based on average band  
312 frequency, Nei's unbiased genetic distance, principal coordinate analysis (PCoA) and analysis  
313 of molecular variance (AMOVA). To examine possibility of gene flow between cultivated and

314 wild enset accessions, the correlation between genetic distance ( $\Phi_{PT}$ ) and geographic distance  
315 (km) was estimated using a Mantel test (Mantel, 1967) implemented in GenAlex using 10,000  
316 random permutations.

317

### 318 **Genotyping by sequencing (GBS) preparation and analysis**

319 Genotyping-by-sequencing was conducted for 149 enset samples (125 domestic and 24 wild;  
320 Supplementary Table 2) that were selected to capture the genetic diversity shown by AFLP.  
321 The GBS library preparation was carried out as described by Xie *et al.* (2017) including a water  
322 negative control as described by Konate *et al.* (2018). The DNA concentration of each  
323 individual library was normalized to 5 ng/ $\mu$ l. Two pooled libraries were created, each by  
324 pooling the individual libraries from 75 uniquely barcoded samples (25 ng per sample)  
325 (Supplementary Table 2). Each pooled library was then amplified in 10 PCR reactions, each  
326 containing 10  $\mu$ l of digested/ligated DNA library, 12.5  $\mu$ l of NEB MasterMix, 2  $\mu$ l of 10  $\mu$ M  
327 forward and reverse Illumina\_PE primers (Supplementary Table 4) and 0.5  $\mu$ l of molecular  
328 biology grade water (Sigma). The amplification reaction was carried using a T1000  
329 Thermocycler at 95°C for 30 s, 16 cycles of (95°C for 30 s, 62°C for 20 s, 68°C for 30 s) and  
330 72°C for 5 min. Amplification products were pooled together and cleaned using AMPure XP  
331 beads (Beckman Coulter, Australia) (1:1 ratio) to remove excess primers and unremoved  
332 adaptors. Libraries were sequenced using an Illumina NextSeq High Output 75 bp single-end  
333 run (Illumina 1.9 Inc., San Diego, CA, United States) at the Australian Genome Research  
334 Facility (AGRF, Adelaide, SA, Australia).

335

### 336 **GBS SNP calling**

337 SNP calling was performed using two pipelines: *de novo*-based (reference genome  
338 independent) TASSEL-UNEAK pipeline (Lu *et al.*, 2013) and the reference-based TASSEL-

339 GBS pipeline (Glaubitz *et al.*, 2014; Torkamaneh *et al.*, 2016). Only sequences containing  
340 identical matches to the barcodes followed by the expected sequence of three nucleotides  
341 remaining from a *MspI* cut-site (5'-CGG-3') were selected for the identification of SNPs.  
342 FASTQ files containing barcoded sequence reads were demultiplexed using unique barcodes  
343 for each sample and trimmed to 64 bp (not including the barcodes). Identical sequence reads  
344 were collapsed into tags and sequencing tags from the four NextSeq Illumina sequencing lanes  
345 were merged to form one master tag. These sequence tags were mapped to the wild (diploid)  
346 banana (*Musa acuminata ssp. malaccensis*) genome sequence (D'hont *et al.*, 2012) to deduce  
347 their genomic position. Tags with single base pair mismatches between samples were  
348 considered as SNPs and were generated in Hapmap format.

349

### 350 **Genetic diversity and population structure analysis**

351 Genetic diversity and genetic differentiation ( $F_{st}$ ) were calculated using PopGenome R package  
352 (Pfeifer *et al.*, 2014). Heterozygosity (the proportion of heterozygous individuals in the  
353 population), gene diversity (expected heterozygosity) and polymorphic information content  
354 (PIC) were calculated using Power Marker V3.25 (Liu & Muse, 2005). To examine the  
355 relationship between cultivated and wild enset accessions, PCA plots and phylogenetic tree  
356 (UPGMA) were built using TASSEL 5 (Bradbury *et al.*, 2007). GenGIS (Parks *et al.*, 2009)  
357 was used to display the phylogenetic tree with the geographic regions of sample collection.

358

359 Population structure was analysed using descriptive analysis of principal components (DAPC)  
360 (Jombart *et al.*, 2010) and STRUCTURE (Pritchard *et al.*, 2000). The software STRUCTURE  
361 was used to analyse the hierarchical population structure by setting the length of the burn-in  
362 period to 50,000 iterations and number of the MCMC replications after burn-in to 50,000.  
363 Between two to nine population clusters (K) were considered, with 10 iterations conducted for

364 each  $K$ -value. The best  $K$ -value was determined using Structure Harvester (Earl, 2012) based  
365 on delta  $K$  ( $\Delta K$ ) (Evanno et al., 2005) and maximum log likelihood  $L(K)$  (Rosenberg *et al.*,  
366 2001)

367

368 Genome-wide nucleotide diversity (average pairwise nucleotide differences) and population  
369 differentiation ( $F_{st}$ ) within and between wild and cultivated populations were calculated using  
370 a 500 kb non-overlapping sliding window. To obtain genetic diversity per window, nucleotide  
371 diversity was divided by number of SNPs per sliding window. These statistics were calculated  
372 using R package PopGenome (Pfeifer *et al.*, 2014) and plotted using Circos (Krzywinski et  
373 al., 2009) to visualize the pattern of genetic diversity across the whole enset genome.

374

375 To detect loci under selection during enset domestication and adaptation, the FDIST2 method  
376 adopted by Beaumont and Nichols (1996) was applied using lositan software (Antao *et al.*,  
377 2008).  $F_{st}$  value was calculated for each SNP using allele frequencies conditional on expected  
378 heterozygosity ( $He$ ), and P-values for each SNP were calculated. SNPs within tags assigned  
379 to one of the wild banana chromosomes were used to identify  $F_{st}$  outliers.  $F_{st}$  outlier analysis  
380 was carried out with 50,000 interactions at 99% confidence interval. Then we searched for  
381 genes containing these outlier SNPs in the wild banana genome to identify potential genes  
382 under selection during enset domestication using magrittr R package (Bache & Wickham,  
383 2014) and generated gene ID. The putative function of these genes were searched using  
384 UNIPROT database (<https://www.uniprot.org/>) based on the gene ID.

385

386

387

388



## 389 **Acknowledgments**

390 This study was conducted as part of a biosafety capacity-building project for sub-Saharan  
391 Africa implemented by the international centre for genetic engineering and biotechnology  
392 (ICGEB). This report is based on research funded by the Bill & Melinda Gates Foundation.  
393 The findings and conclusions contained within are those of the authors and do not necessarily  
394 reflect positions or policies of the Bill & Melinda Gates Foundation nor the ICGEB. Dr Lopez  
395 is currently partially supported by the National Institute of Food and Agriculture, U.S.  
396 Department of Agriculture, Hatch Program number 2352987000.

397

## 398 **Conflict of interest**

399 The authors declare that they have no conflict of interest

400

401

## 402 **References**

- 403 **Antao T, Lopes A, Lopes RJ, Beja-Pereira A, Luikart G. 2008.** LOSITAN: a workbench  
404 to detect molecular adaptation based on a F ST-outlier method. *BMC bioinformatics*  
405 **9**(1): 323.
- 406 **Bache SM, Wickham H. 2014.** magrittr: a forward-pipe operator for R. *R package version*  
407 **1**(1).
- 408 **Beaumont MA, Balding DJ. 2004.** Identifying adaptive genetic divergence among  
409 populations from genome scans. *Molecular Ecology* **13**(4): 969-980.
- 410 **Beaumont MA, Nichols RA. 1996.** Evaluating loci for use in the genetic analysis of  
411 population structure. *Proceedings of the Royal Society of London. Series B:*  
412 *Biological Sciences* **263**(1377): 1619-1626.
- 413 **Becerra V, Paredes M, Ferreira ME, Gutiérrez E, Díaz LM. 2017.** Assessment of the  
414 genetic diversity and population structure in temperate japonica rice germplasm used  
415 in breeding in Chile, with SSR markers. *Chilean journal of agricultural research*  
416 **77**(1): 15-26.
- 417 **Birmeta G. 2004.** *Genetic variability and biotechnological studies for the conservation and*  
418 *improvement of Ensete ventricosum*. Alnarp: Sveriges lantbruksuniv., Acta  
419 Universitatis Agriculturae Sueciae.
- 420 **Birmeta G, Nybom H, Bekele E. 2004.** Distinction between wild and cultivated enset  
421 (*Ensete ventricosum*) gene pools in Ethiopia using RAPD markers. *Hereditas* **140**(2):  
422 139-148.
- 423 **Borrell JS, Biswas MK, Goodwin M, Blomme G, Schwarzacher T, Heslop-Harrison J,**  
424 **Wendawek AM, Berhanu A, Kallow S, Janssens S. 2019.** Enset in Ethiopia: a  
425 poorly characterized but resilient starch staple. *Annals of botany* **123**(5): 747-766.

- 426 **Bradbury PJ, Zhang Z, Kroon DE, Casstevens TM, Ramdoss Y, Buckler ES. 2007.**  
427 TASSEL: software for association mapping of complex traits in diverse samples.  
428 *Bioinformatics* **23**(19): 2633-2635.
- 429 **Brandt SA, Spring A, Hiebsch C, McCabe JT, Tabogie E, Diro M, Wolde-Michael G,**  
430 **Yntiso G, Shigeta M, Tesfaye S 1997a.** The " Tree Against Hunger": Enset-Based  
431 Agricultural System in Ethiopia: American Association for the Advancement of  
432 Science Washington, DC, USA.
- 433 **Brandt SA, Spring A, Hiebsch C, McCabe JT, Tabogie E, Diro M, Wolde-Michael G,**  
434 **Yntiso G, Shigeta M, Tesfaye S. 1997b.** The tree against hunger. Enset-based  
435 agricultural systems in Ethiopia *American Association for the Advancement of*  
436 *Science , Washington DC.*
- 437 **Burgos-Hernández M, Hernández DG, Castillo-Campos G. 2013.** Genetic diversity and  
438 population genetic structure of wild banana *Musa ornata* (Musaceae) in Mexico. *Plant*  
439 *systematics and evolution* **299**(10): 1899-1910.
- 440 **Chakrabarti M, Zhang N, Sauvage C, Muñoz S, Blanca J, Cañizares J, Diez MJ,**  
441 **Schneider R, Mazourek M, McClead J. 2013.** A cytochrome P450 regulates a  
442 domestication trait in cultivated tomato. *Proceedings of the National Academy of*  
443 *Sciences* **110**(42): 17125-17130.
- 444 **Cheesman E. 1947.** Classification of the Bananas: The Genus *Musa* L. *Kew Bulletin*: 106-  
445 117.
- 446 **D'hont A, Denoeud F, Aury J-M, Baurens F-C, Carreel F, Garsmeur O, Noel B, Bocs S,**  
447 **Droc G, Rouard M. 2012.** The banana (*Musa acuminata*) genome and the evolution  
448 of monocotyledonous plants. *Nature* **488**(7410): 213.
- 449 **de Albuquerque HYG, Carmo CDd, Brito AC, Oliveira EJd. 2018.** Genetic diversity of  
450 *Manihot esculenta* Crantz germplasm based on single-nucleotide polymorphism  
451 markers. *Annals of applied biology* **173**(3): 271-284.
- 452 **Earl DA. 2012.** STRUCTURE HARVESTER: a website and program for visualizing  
453 STRUCTURE output and implementing the Evanno method. *Conservation genetics*  
454 *resources* **4**(2): 359-361.
- 455 **Eshetae MA, Hailu BT, Demissew S. 2019.** Spatial characterization and distribution  
456 modelling of Ensete ventricosum (wild and cultivated) in Ethiopia. *Geocarto*  
457 *International*: 1-16.
- 458 **Evanno G, Regnaut S, Goudet J. 2005.** Detecting the number of clusters of individuals  
459 using the software STRUCTURE: a simulation study. *Molecular Ecology* **14**(8):  
460 2611-2620.
- 461 **Gerura FN, Meressa BH, Martina K, Tesfaye A, Olango TM, Nasser Y. 2019.** Genetic  
462 diversity and population structure of enset (*Ensete ventricosum* Welw Cheesman)  
463 landraces of Gurage zone, Ethiopia. *Genetic resources and crop evolution* **66**(8):  
464 1813-1824.
- 465 **Getachew S, Mekbib F, Admassu B, Kelemu S, Kidane S, Negisho K, Djikeng A, Nzuki**  
466 **I. 2014.** A Look into Genetic Diversity of Enset (*Ensete ventricosum* (Welw.)  
467 Cheesman) Using Transferable Microsatellite Sequences of Banana in Ethiopia.  
468 *Journal of Crop Improvement* **28**(2): 159-183.
- 469 **Glaubitz JC, Casstevens TM, Lu F, Harriman J, Elshire RJ, Sun Q, Buckler ES. 2014.**  
470 TASSEL-GBS: a high capacity genotyping by sequencing analysis pipeline. *PLoS*  
471 *One* **9**(2): e90346.
- 472 **Gunesequera B, Torabinejad J, Robinson J, Gillaspay GE. 2007.** Inositol polyphosphate 5-  
473 phosphatases 1 and 2 are required for regulating seedling growth. *Plant Physiology*  
474 **143**(3): 1408-1417.

- 475 **Guzzon F, Müller JV. 2016.** Current availability of seed material of enset (*Ensete*  
476 *ventricosum*, Musaceae) and its Sub-Saharan wild relatives. *Genetic resources and*  
477 *crop evolution* **63**(2): 185-191.
- 478 **Harrison J, Moore KA, Paszkiewicz K, Jones T, Grant MR, Ambacheew D, Muzemil S,**  
479 **Studholme DJ. 2014.** A Draft Genome Sequence for *Ensete ventricosum*, the  
480 Drought-Tolerant “Tree Against Hunger”. *Agronomy* **4**(1): 13-33.
- 481 **Heslop-Harrison J, Borrell J, Biswas M, Goodwin M, Blomme G, Schwarzacher T,**  
482 **Wendawek A, Berhanu A, Kallow S, Janssens S. 2019.** Enset in Ethiopia: a poorly  
483 characterised but resilient starch staple.
- 484 **Hildebrand E 2001a.** Morphological characterization of domestic vs. forest-growing *Ensete*  
485 *ventricosum* (Welw.) Cheesman, Musaceae, in Sheko district, Bench-Maji Zone,  
486 southwest Ethiopia. In: Friis IaR, O ed. *Biodiversity Research in the Horn of Africa*  
487 *Region*: Royal Danish Academy of Sciences and Letters  
488 287-309.
- 489 **Hildebrand E 2001b.** Morphological characterization of domestic vs. forest-growing *Ensete*  
490 *ventricosum* (Welw.) Cheesman, Musaceae, in Sheko district, Bench-Maji Zone,  
491 southwest Ethiopia. *Biodiversity Research in the Horn of Africa Region: Proceedings*  
492 *of the Third International Symposium on the Flora of Ethiopia and Eritrea at the*  
493 *Carlsberg Academy, Copenhagen, August 25-27, 1999*: Kgl. Danske Videnskabernes  
494 Selskab. 287.
- 495 **Ishida K, Yamashino T, Mizuno T. 2008.** Expression of the cytokinin-induced type-A  
496 response regulator gene *ARR9* is regulated by the circadian clock in *Arabidopsis*  
497 *thaliana*. *Bioscience, biotechnology, and biochemistry*: 0810071089-0810071089.
- 498 **Jan A, Maruyama K, Todaka D, Kidokoro S, Abo M, Yoshimura E, Shinozaki K,**  
499 **Nakashima K, Yamaguchi-Shinozaki K. 2013.** *OsTZF1*, a CCCH-tandem zinc  
500 finger protein, confers delayed senescence and stress tolerance in rice by regulating  
501 stress-related genes. *Plant Physiology* **161**(3): 1202-1216.
- 502 **Jombart T, Devillard S, Balloux F. 2010.** Discriminant analysis of principal components: a  
503 new method for the analysis of genetically structured populations. *BMC genetics*  
504 **11**(1): 94.
- 505 **Kamanda I, Blay E, Asante I, Danquah A, Ifie B, Parkes E, Kulakow P, Rabbi I, Conteh**  
506 **A, Kamara J. 2020.** Genetic diversity of provitamin-A cassava (*Manihot esculenta*  
507 *Crantz*) in Sierra Leone. *Genetic resources and crop evolution*: 1-16.
- 508 **Kang J, Cui H, Jia S, Liu W, Yu R, Wu Z, Wang Z. 2020.** *Arabidopsis thaliana* *MLK3*, a  
509 Plant-specific Casein Kinase 1, Negatively Regulates Flowering and Phosphorylates  
510 Histone H3 in Vitro. *Genes* **11**(3): 345.
- 511 **Konate M, Wilkinson M, Mayne B, Pederson S, Scott E, Berger B, Rodriguez Lopez C.**  
512 **2018.** Salt stress induces non-CG methylation in coding regions of barley seedlings  
513 (*Hordeum vulgare*). *Epigenomes* **2**(2): 12.
- 514 **Krzywinski MI, Schein JE, Birol I, Connors J, Gascoyne R, Horsman D, Jones SJ,**  
515 **Marra MA. 2009.** Circos: an information aesthetic for comparative genomics.  
516 *Genome research*.
- 517 **Lam H-M, Xu X, Liu X, Chen W, Yang G, Wong F-L, Li M-W, He W, Qin N, Wang B.**  
518 **2010.** Resequencing of 31 wild and cultivated soybean genomes identifies patterns of  
519 genetic diversity and selection. *Nature genetics* **42**(12): 1053.
- 520 **Li N, Li Y. 2014.** Ubiquitin-mediated control of seed size in plants. *Frontiers in plant*  
521 *science* **5**: 332.

- 522 **Li Q-T, Lu X, Song Q-X, Chen H-W, Wei W, Tao J-J, Bian X-H, Shen M, Ma B, Zhang**  
523 **W-K. 2017.** Selection for a zinc-finger protein contributes to seed oil increase during  
524 soybean domestication. *Plant Physiology* **173**(4): 2208-2224.
- 525 **Liu K, Muse SV. 2005.** PowerMarker: an integrated analysis environment for genetic marker  
526 analysis. *Bioinformatics* **21**(9): 2128-2129.
- 527 **López CMR, Morán P, Lago F, Espiñeira M, Beckmann M, Consuegra S. 2012.**  
528 Detection and quantification of tissue of origin in salmon and veal products using  
529 methylation sensitive AFLPs. *Food chemistry* **131**(4): 1493-1498.
- 530 **Lotterhos KE, Whitlock MC. 2014.** Evaluation of demographic history and neutral  
531 parameterization on the performance of FST outlier tests. *Molecular Ecology* **23**(9):  
532 2178-2192.
- 533 **Lu F, Lipka AE, Glaubitz J, Elshire R, Cherney JH, Casler MD, Buckler ES, Costich**  
534 **DE. 2013.** Switchgrass genomic diversity, ploidy, and evolution: novel insights from  
535 a network-based SNP discovery protocol. *PLoS genetics* **9**(1).
- 536 **Ma R, Yuan H, An J, Hao X, Li H. 2018.** A *Gossypium hirsutum* GDSL lipase/hydrolase  
537 gene (GhGLIP) appears to be involved in promoting seed growth in Arabidopsis.  
538 *PLoS One* **13**(4).
- 539 **Mandel J, Dechaine J, Marek L, Burke J. 2011.** Genetic diversity and population structure  
540 in cultivated sunflower and a comparison to its wild progenitor, *Helianthus annuus* L.  
541 *Theoretical and Applied Genetics* **123**(5): 693-704.
- 542 **Mantel N. 1967.** The detection of disease clustering and a generalized regression approach.  
543 *Cancer research* **27**(2 Part 1): 209-220.
- 544 **Martínez-Ainsworth NE, Tenailon MI. 2016.** Superheroes and masterminds of plant  
545 domestication. *Comptes rendus biologiques* **339**(7): 268-273.
- 546 **McKey D, Elias M, Pujol B, Duputié A. 2010.** The evolutionary ecology of clonally  
547 propagated domesticated plants. *New Phytologist* **186**(2): 318-332.
- 548 **Miller AJ, Schaal BA. 2006.** Domestication and the distribution of genetic variation in wild  
549 and cultivated populations of the Mesoamerican fruit tree *Spondias purpurea*  
550 L.(Anacardiaceae). *Molecular Ecology* **15**(6): 1467-1480.
- 551 **Negash A, Tsegaye A, van Treuren R, Visser B. 2002.** AFLP analysis of enset clonal  
552 diversity in south and southwestern Ethiopia for conservation. *Crop Science* **42**(4):  
553 1105-1111.
- 554 **Olango TM, Tesfaye B, Catellani M, Pè ME. 2014.** Indigenous knowledge, use and on-  
555 farm management of enset (*Ensete ventricosum* (Welw.) Cheesman) diversity in  
556 Wolaita, southern Ethiopia. *Journal of ethnobiology and ethnomedicine* **10**(1): 41.
- 557 **Olango TM, Tesfaye B, Pagnotta MA, Pè ME, Catellani M. 2015.** Development of SSR  
558 markers and genetic diversity analysis in enset (*Ensete ventricosum* (Welw.)  
559 Cheesman), an orphan food security crop from Southern Ethiopia. *BMC genetics*  
560 **16**(1): 98.
- 561 **Parks DH, Porter M, Churcher S, Wang S, Blouin C, Whalley J, Brooks S, Beiko R.**  
562 **2009.** GenGIS: A geospatial information system for genomic data. *Genome research*:  
563 gr. 095612.095109.
- 564 **Peakall R, Smouse PE. 2012.** GenAlEx 6.5: genetic analysis in Excel. Population genetic  
565 software for teaching and research—an update. *Bioinformatics* **28**(19): 2537-2539.
- 566 **Pfeifer B, Wittelsbürger U, Ramos-Onsins SE, Lercher MJ. 2014.** PopGenome: an  
567 efficient Swiss army knife for population genomic analyses in R. *Molecular biology*  
568 *and evolution* **31**(7): 1929-1936.
- 569 **Pritchard JK, Stephens M, Donnelly P. 2000.** Inference of population structure using  
570 multilocus genotype data. *Genetics* **155**(2): 945-959.

- 571 **Quinlan MB, Quinlan RJ, Dira S. 2014.** Sidama Agro-Pastoralism and Ethnobiological  
572 Classification of its Primary Plant, Enset (*Ensete ventricosum*). *Ethnobiology Letters*  
573 **5**: 116-125.
- 574 **Rosenberg NA, Burke T, Elo K, Feldman MW, Freidlin PJ, Groenen MA, Hillel J,**  
575 **Mäki-Tanila A, Tixier-Boichard M, Vignal A. 2001.** Empirical evaluation of  
576 genetic clustering methods using multilocus genotypes from 20 chicken breeds.  
577 *Genetics* **159**(2): 699-713.
- 578 **Shigeta M. 1990.** Folk In-Situ Conservation of Ensete [*Ensete ventricosum* (Welw.) EE  
579 Cheesman]: Toward the Interpretation of Indigenous Agricultural Science of the Ari,  
580 Southwestern Ethiopia. *African Study Monographs* **10**(3).
- 581 **Shumbulo A, Gecho Y, Tora M. 2012.** Diversity, Challenges and Potentials of Enset  
582 (*Ensete ventricosum*) Production: In Case of Offa Woreda, Wolaita Zone, Southern  
583 Ethiopia. *Food Science and Quality Management* **7**.
- 584 **Silvertown J. 2008.** The evolutionary maintenance of sexual reproduction: evidence from the  
585 ecological distribution of asexual reproduction in clonal plants. *International journal*  
586 *of plant sciences* **169**(1): 157-168.
- 587 **Swain SM, Singh DP, Helliwell CA, Poole AT. 2005.** Plants with increased expression of  
588 ent-kaurene oxidase are resistant to chemical inhibitors of this gibberellin biosynthesis  
589 enzyme. *Plant and Cell Physiology* **46**(2): 284-291.
- 590 **Tobiaw DC, Bekele E. 2013.** Analysis of genetic diversity among cultivated enset (*Ensete*  
591 *ventricosum*) populations from Essera and Kefficho, southwestern part of Ethiopia  
592 using inter simple sequence repeats (ISSRs) marker. *African Journal of Biotechnology*  
593 **10**(70): 15697-15709.
- 594 **Torkamaneh D, Laroche J, Belzile F. 2016.** Genome-wide SNP calling from genotyping by  
595 sequencing (GBS) data: a comparison of seven pipelines and two sequencing  
596 technologies. *PLoS One* **11**(8).
- 597 **Tsegaye A, Struik P. 2002.** Analysis of enset (*Ensete ventricosum*) indigenous production  
598 methods and farm-based biodiversity in major enset-growing regions of southern  
599 Ethiopia. *Experimental Agriculture* **38**(03): 291-315.
- 600 **Uehara TN, Mizutani Y, Kuwata K, Hirota T, Sato A, Mizoi J, Takao S, Matsuo H,**  
601 **Suzuki T, Ito S. 2019.** Casein kinase 1 family regulates PRR5 and TOC1 in the  
602 *Arabidopsis* circadian clock. *Proceedings of the National Academy of Sciences*  
603 **116**(23): 11528-11536.
- 604 **Vos P, Hogers R, Bleeker M, Reijans M, Lee Tvd, Hornes M, Friters A, Pot J, Paleman**  
605 **J, Kuiper M. 1995.** AFLP: a new technique for DNA fingerprinting. *Nucleic acids*  
606 *research* **23**(21): 4407-4414.
- 607 **Wen R, Torres-Acosta JA, Pastushok L, Lai X, Pelzer L, Wang H, Xiao W. 2008.**  
608 *Arabidopsis* UEV1D promotes lysine-63-linked polyubiquitination and is involved in  
609 DNA damage response. *The Plant Cell* **20**(1): 213-227.
- 610 **Xie H, Konate M, Sai N, Tesfamichael KG, Cavagnaro T, Gilliam M, Breen J, Metcalfe**  
611 **A, Stephen JR, De Bei R. 2017.** Global DNA methylation patterns can play a role in  
612 defining terroir in grapevine (*Vitis vinifera* cv. Shiraz). *Frontiers in plant science* **8**:  
613 1860.
- 614 **Yang H, Wei C-L, Liu H-W, Wu J-L, Li Z-G, Zhang L, Jian J-B, Li Y-Y, Tai Y-L,**  
615 **Zhang J. 2016.** Genetic divergence between *Camellia sinensis* and its wild relatives  
616 revealed via genome-wide SNPs from RAD sequencing. *PLoS One* **11**(3): e0151424.
- 617 **Yemata G. 2020.** Ensete *ventricosum*: A Multipurpose Crop against Hunger in Ethiopia. *The*  
618 *Scientific World Journal* **2020**.
- 619 **Yemataw Z, Mohamed H, Diro M, Addis T, Blomme G. 2014.** Ethnic-based diversity and  
620 distribution of enset (*Ensete ventricosum*) clones in southern Ethiopia.

- 621 **Zhao D-w, Yang J-b, Yang S-x, Kato K, Luo J-p. 2014.** Genetic diversity and  
 622 domestication origin of tea plant *Camellia taliensis* (Theaceae) as revealed by  
 623 microsatellite markers. *BMC plant biology* **14**(1): 14.  
 624 **Zhong R, Ye Z-H. 2004.** Molecular and biochemical characterization of three WD-repeat-  
 625 domain-containing inositol polyphosphate 5-phosphatases in *Arabidopsis thaliana*.  
 626 *Plant and Cell Physiology* **45**(11): 1720-1728.

627

628

629

630 **Table 1:** Summery of cultivated and wild enset accessions sampled from six regions in South  
 631 and South Western Ethiopia.

| Region  | Sub-region | Number of households | Number of samples |      | Total samples |
|---------|------------|----------------------|-------------------|------|---------------|
|         |            |                      | cultivated        | wild |               |
| Dawro   | Loma       | 7                    | 16                | 1    | 17            |
|         | Mareka     | 5                    | 7                 | 2    | 9             |
| Guragie | Cheha      | 5                    | 7                 | 0    | 7             |
|         | Gumer      | 8                    | 22                | 0    | 22            |
| Holeta  | Holeta     | 1                    | 11                | 0    | 11            |
| Keffa   | Chena      | 7                    | 20                | 4    | 24            |
|         | Decha      | 8                    | 25                | 13   | 38            |
| Omo     | South Ari  | 10                   | 36                | 6    | 42            |
| Sheka   | Benji      |                      | 0                 | 4    | 4             |
|         | Tepi       |                      | 0                 | 8    | 8             |
| Sidama  | Shebedino  | 6                    | 19                | 0    | 19            |
|         | Korcchie   | 7                    | 29                | 0    | 29            |
| Total   |            | 64                   | 192               | 38   | 230           |

632

633

634

635 **Table 2:** Analysis of Molecular Variance (AMOVA) using AFLP markers for 192 accessions  
636 of cultivated enset collected from seven regions

| Source             | df  | SS          | MS     | Est.Var. | % of variation | P-Value |
|--------------------|-----|-------------|--------|----------|----------------|---------|
| Among Populations  | 5   | 173.32<br>0 | 34.664 | 0.915    | 13%            | 0.0001  |
| Within Populations | 186 | 1175.024    | 6.317  | 6.317    | 87%            |         |
| Total              | 191 | 1348.344    |        | 7.232    | 100%           |         |

637 df, degree of freedom; Est.Var, estimated variance; SS, sum of squares; %, the % of variance  
638 explained by within and across regions

639

640 **Table 3:** Total number of filtered and unfiltered SNP markers distributed across 11  
641 chromosomes and chr\_unknown (SNPs within contigs that had not been assigned to a  
642 chromosome in the assembly).

| Chromosome   | Number SNP markers |          |
|--------------|--------------------|----------|
|              | Unfiltered         | Filtered |
| 1            | 1644               | 422      |
| 2            | 1262               | 251      |
| 3            | 1801               | 387      |
| 4            | 1978               | 462      |
| 5            | 1702               | 399      |
| 6            | 2056               | 417      |
| 7            | 1732               | 410      |
| 8            | 1955               | 442      |
| 9            | 1709               | 396      |
| 10           | 1708               | 368      |
| 11           | 1536               | 327      |
| ChrUn_random | 3800               | 887      |
| Total        | 22883              | 5169     |

643

644

645

646 **Table 4:** Genetic diversity analysis of cultivated and wild enset accessions collected from six  
647 major enset producing regions of Ethiopia, analysed using 5169 GBS-based SNP markers

648

| Category   | Sample Size | Major allele frequency | Gene Diversity | Heterozygosity | PIC        |
|------------|-------------|------------------------|----------------|----------------|------------|
| Cultivated | 120         | 0.71±0.002             | 0.40±0.003     | 0.26±0.003     | 0.35±0.003 |
| Wild       | 21          | 0.68±0.002             | 0.42±0.002     | 0.21±0.002     | 0.37±0.002 |

649

650

651 **Table 5:** Number and proportion of nucleotide combinations of the 5169 SNP markers

| Allele          | Number | Proportion (%) |
|-----------------|--------|----------------|
| A/C             | 567    | 10.97          |
| A/G             | 1502   | 29.06          |
| A/T             | 431    | 8.34           |
| C/G             | 504    | 9.75           |
| C/T             | 1449   | 28.03          |
| G/T             | 580    | 11.22          |
| multiple allele | 136    | 2.63           |
| Total           | 5169   | 100            |

652

653

654

655



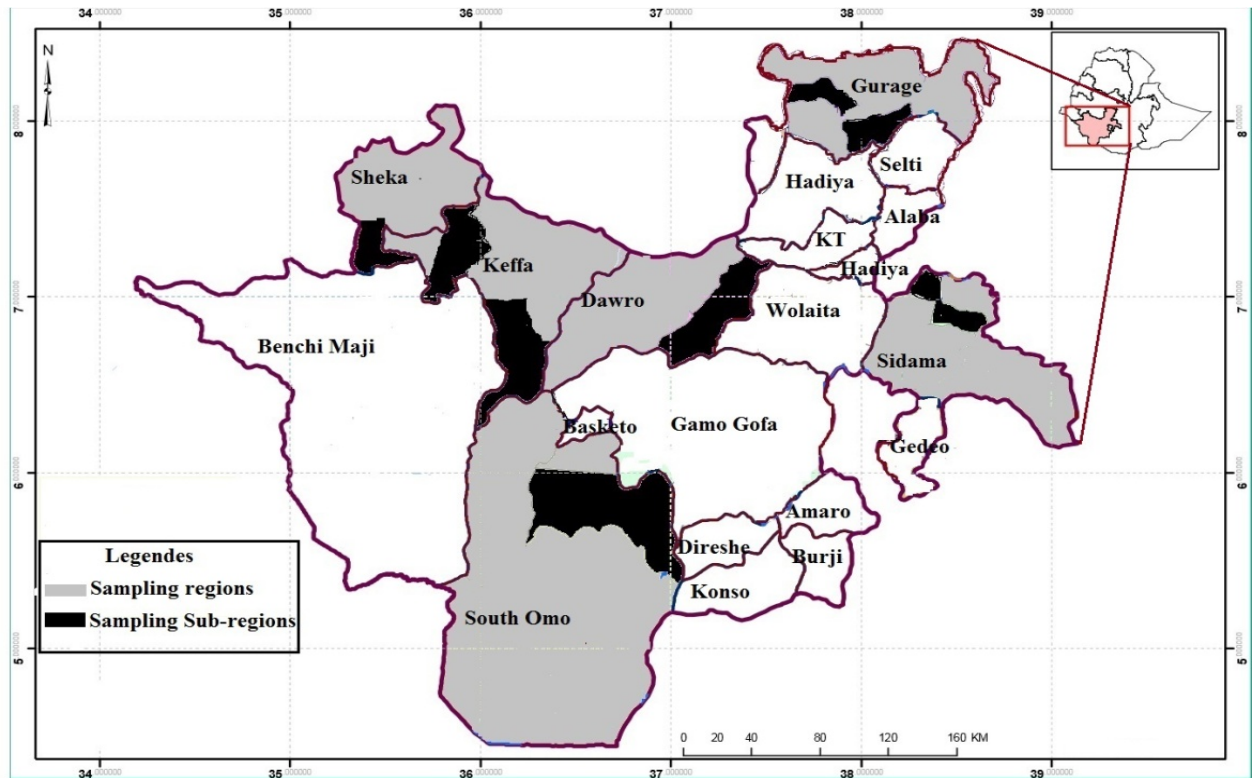

656

657 **Fig.1.** Sampling regions and sub-regions located in Southern Nation, Nationalities and People

658 Region (SNNPR), Ethiopia.

659

660

661

662

663

664

665

666

667

668

669

670

671

672

673

674

675

676

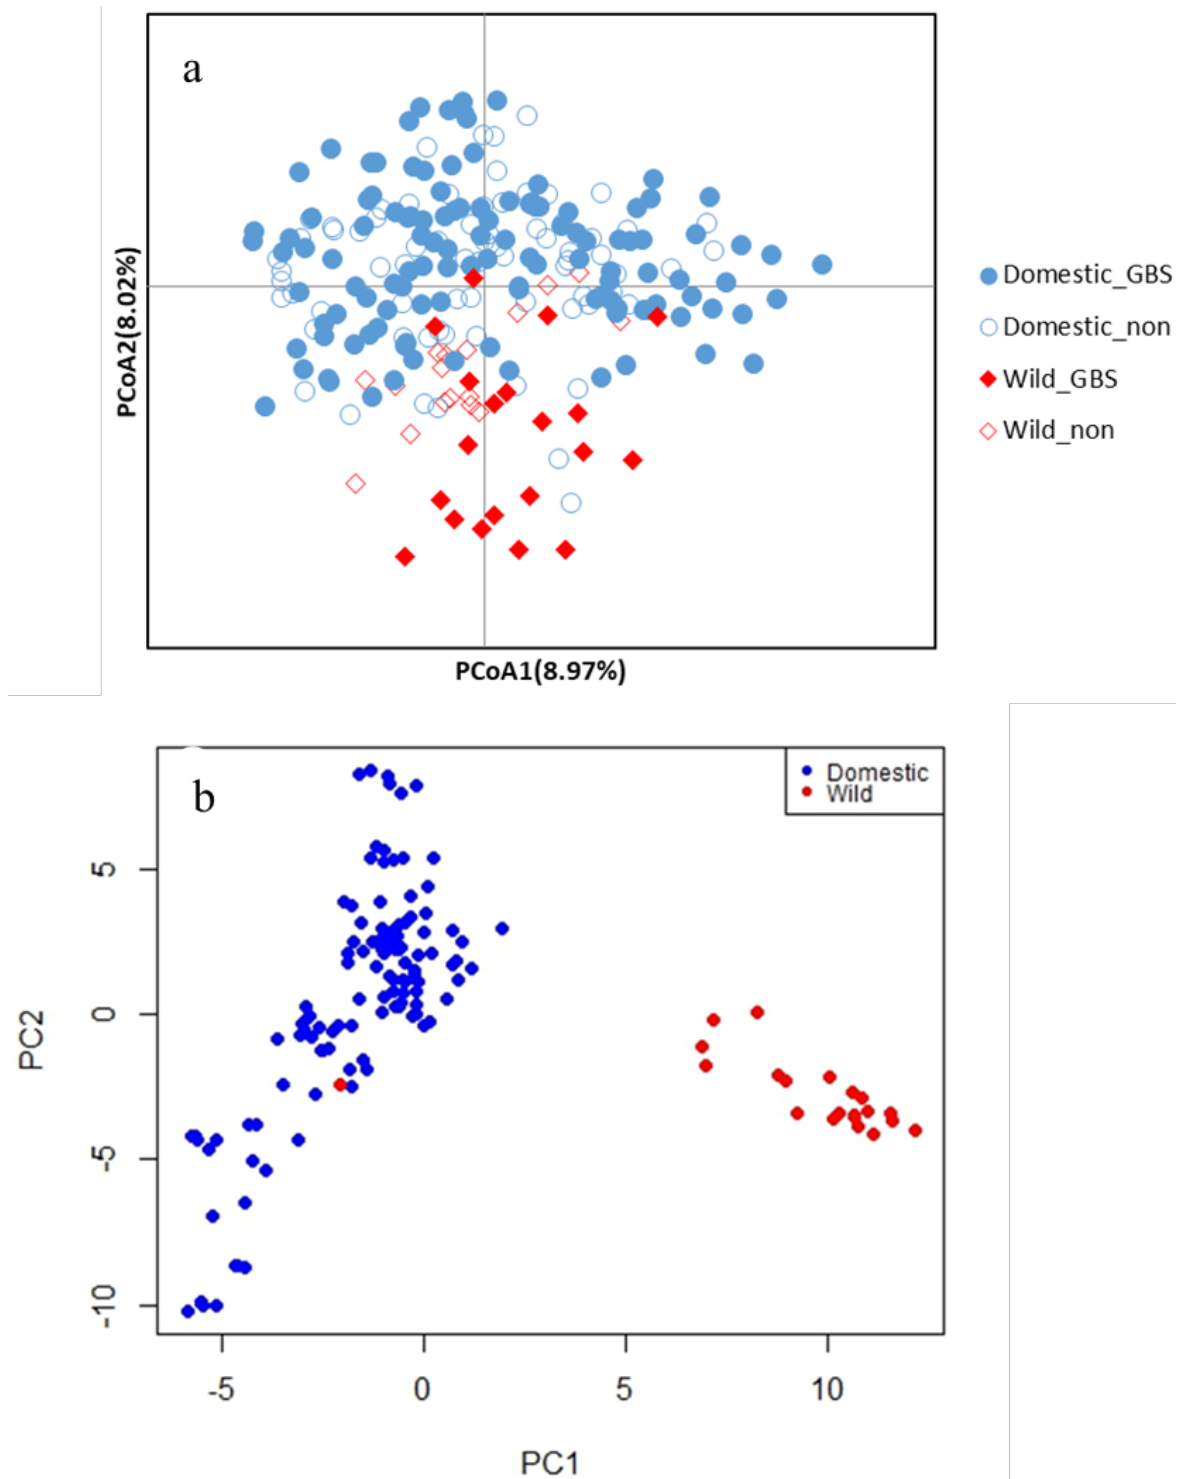

677

678 **Fig.2. a)** Principal Coordinate Analysis (PcoA) of 192 cultivated and 38 wild enset samples  
679 which are selected (141) and not selected (89) for GBS analysis. **b)** Principal Component  
680 Analysis (PCA) of 120 cultivated and 21 wild of enset accessions collected six top enset  
681 producing regions of Ethiopia, using GBS-based genome-wide SNPs 5169 SNP markers

682

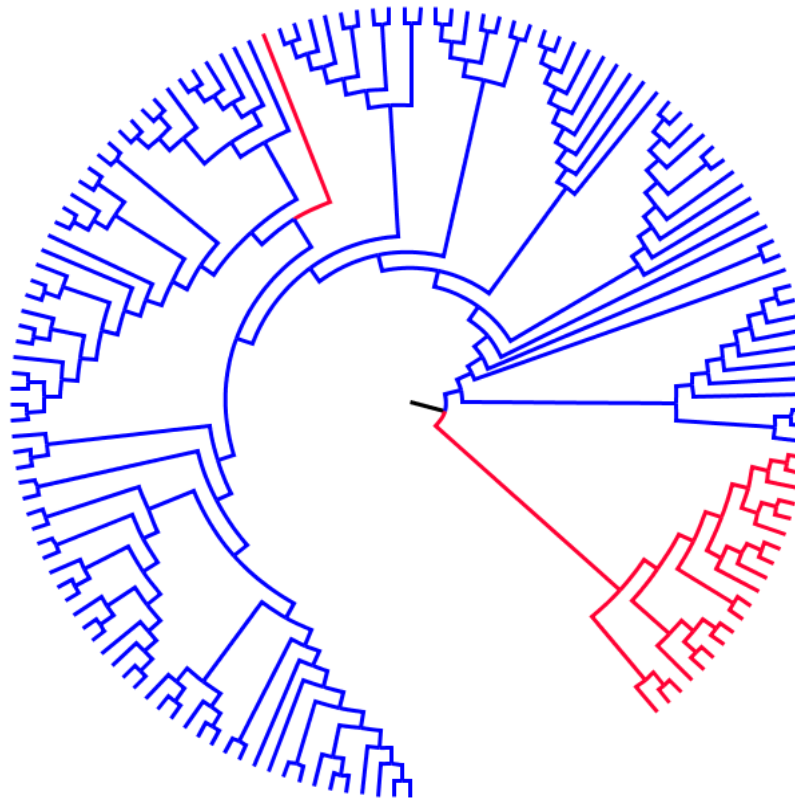

683  
684 **Fig.3.** UPGMA phylogenetic tree of 120 cultivated (blue clades) and 21 wild (red clades) of  
685 enset accessions using GBS-based genome-wide SNPs 5169 SNP markers.  
686

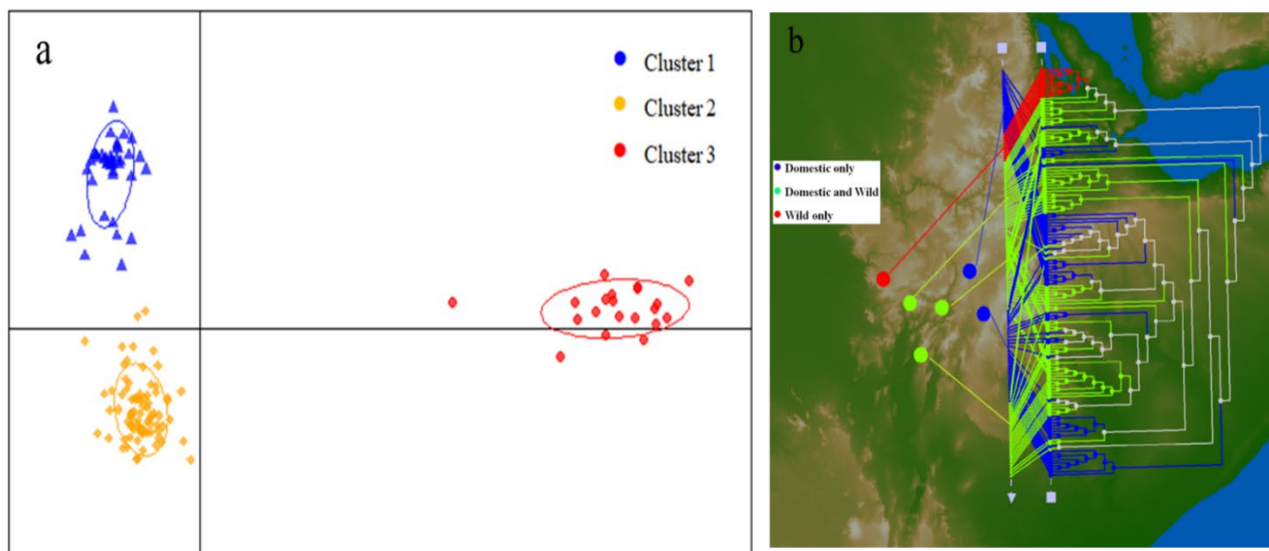

687  
688 **Fig.4.** Genetic structure of 141 enset accessions using 5169 genome-wide SNP markers a)  
689 Population genetic structure using Discriminant Analysis of Principal Components (DAPC).  
690 b) GenGIS plot for the three clusters plotted with phylogenetic tree combined with the  
691 corresponding regions of collection. Samples were collected from different regions, regions  
692 with both domestic and wild, only domestic and only wild enset accessions.

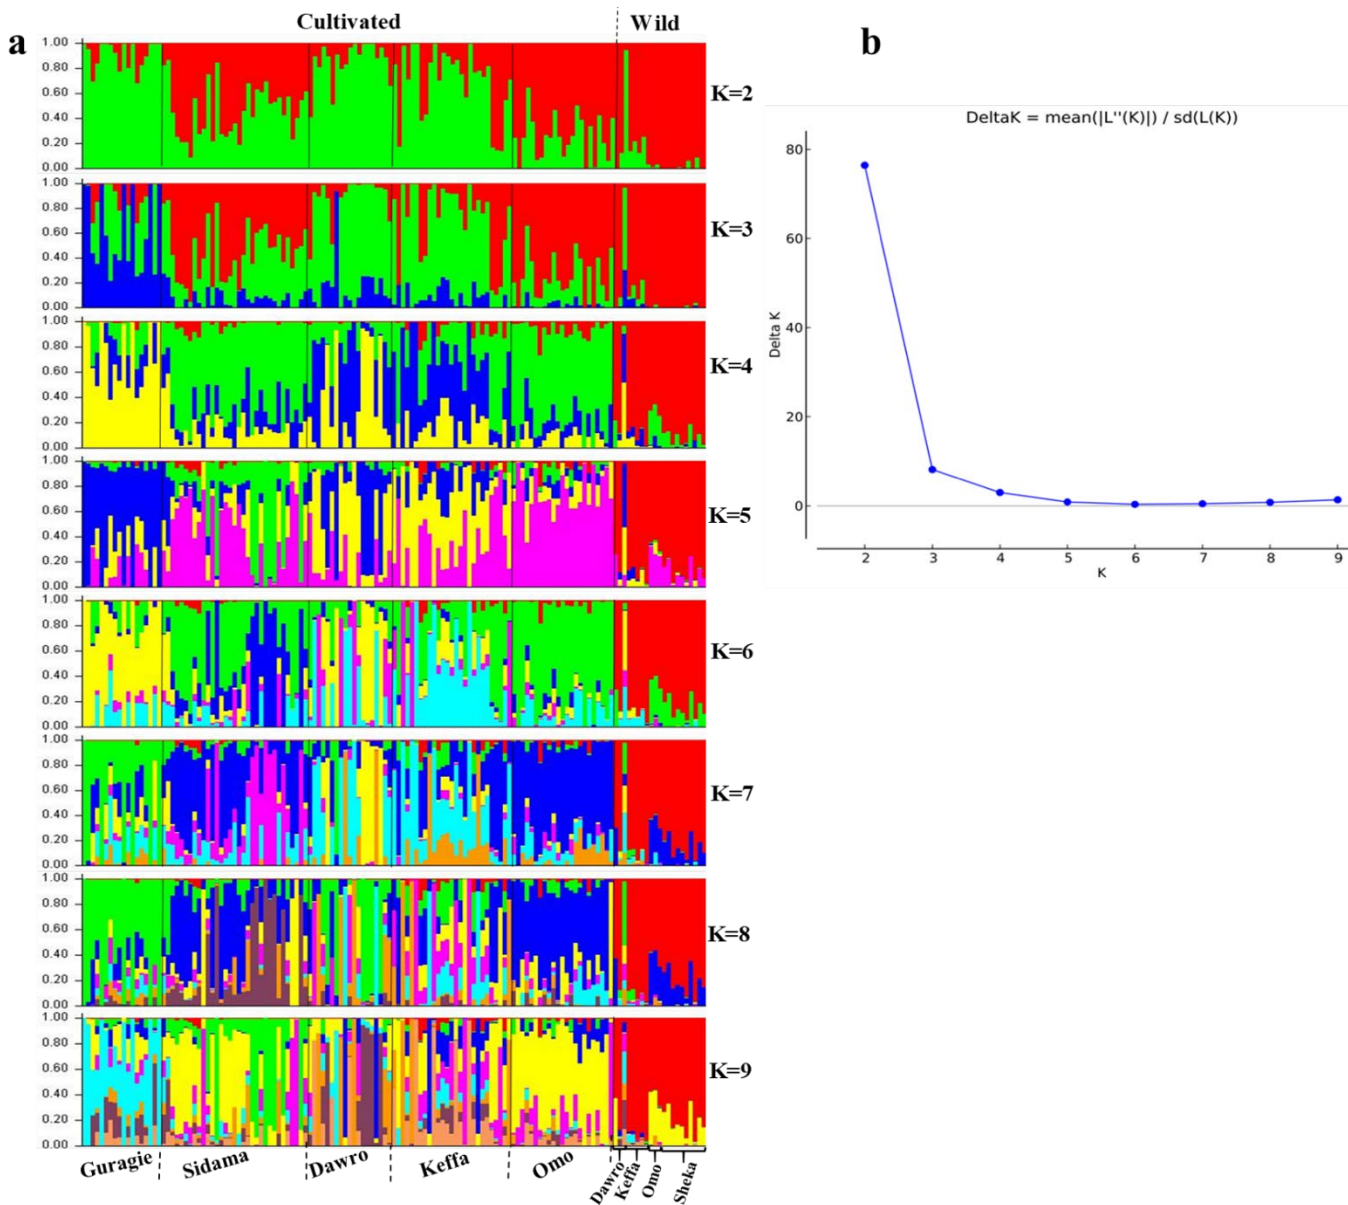

693

694 **Fig.5.** a) Estimated population structure of 141 cultivated and wild enset accessions analysed  
695 using the software STRUCTURE. Each accession is represented with vertical line, which is  
696 partitioned into coloured segments which represent the estimated membership fraction in the  
697  $K$  clusters b) Evanno plot of  $\Delta K$  calculated from  $K$  ranging from 2 to 9 (each  $K$  repeated  
698 10 times) analysed using Structure-Harvester (Evanno *et al.*, 2005).

699

700

701

702

703

704

705

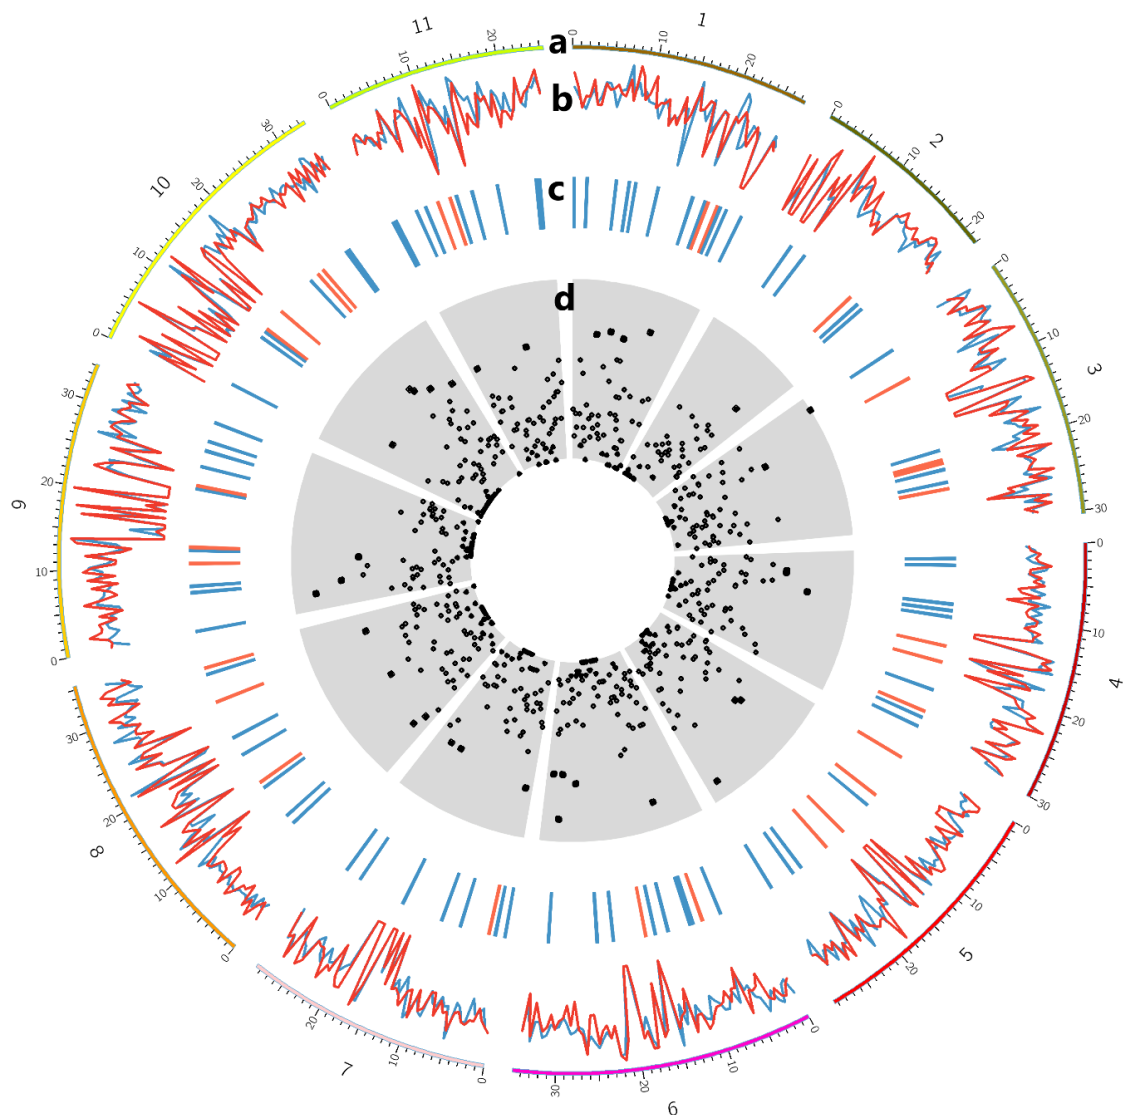

706

707

708 **Fig.6.** Summary of genetic diversity and genetic differentiation of cultivated and wild enset  
709 accessions measured within 500kb sliding window drawn using circos plot. **a)** The 11  
710 Chromosomes (Mb) portrayed along the perimeter of each circle, **b)** Genetic diversity of  
711 cultivated (blue) and wild (red) enset accessions, genetic diversity for each sliding window was  
712 calculated nucleotide diversity divided by number of markers. **c)**  $F_{st}$  less than 0.02 (red) and  
713 greater than 0.2 (blue), **d)** total count of SNP markers per window, dots near the centre  
714 represent a low number of SNPs and the dots further out represent high numbers of SNPs.

715

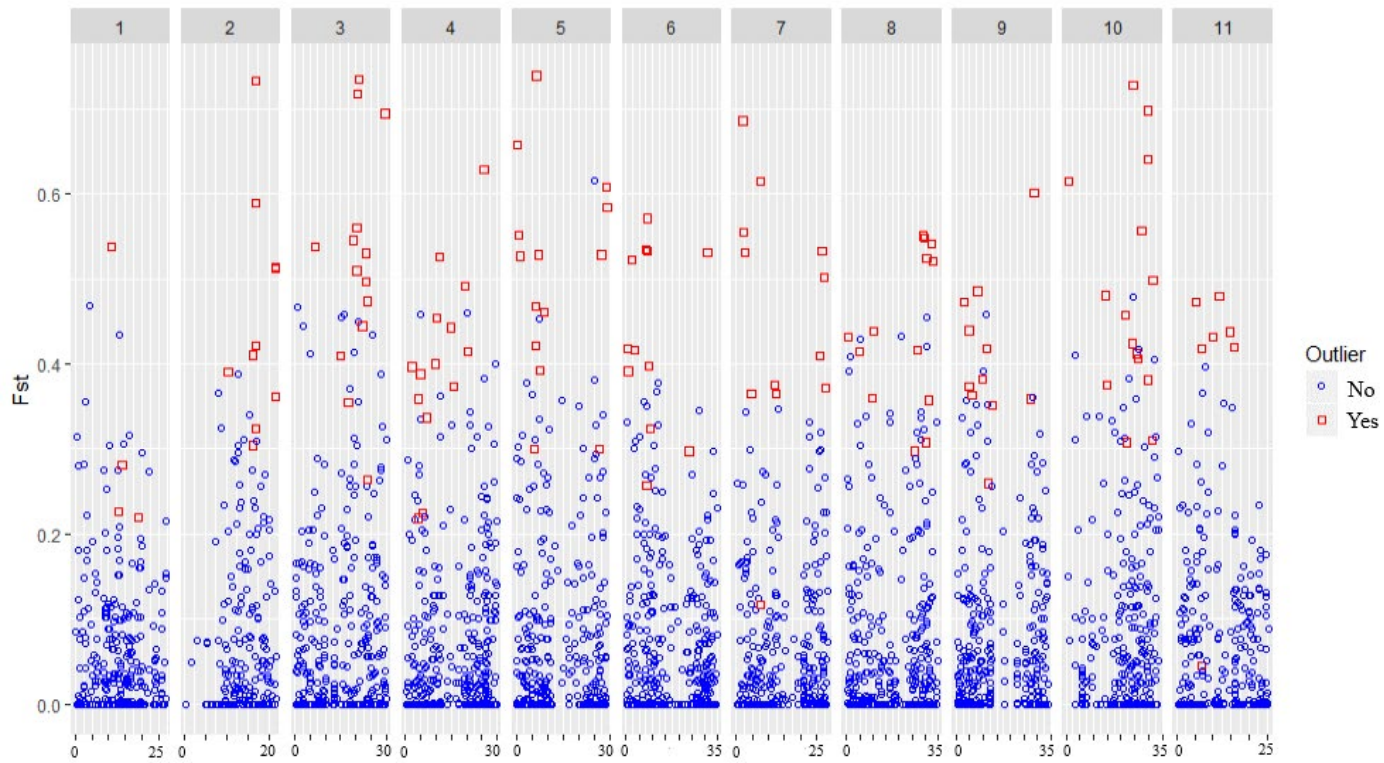

**Fig.7.**  $F_{st}$  values of 5169 SNP loci, displayed according to their genomic positions within 5 Mb intervals on the 11 chromosomes.

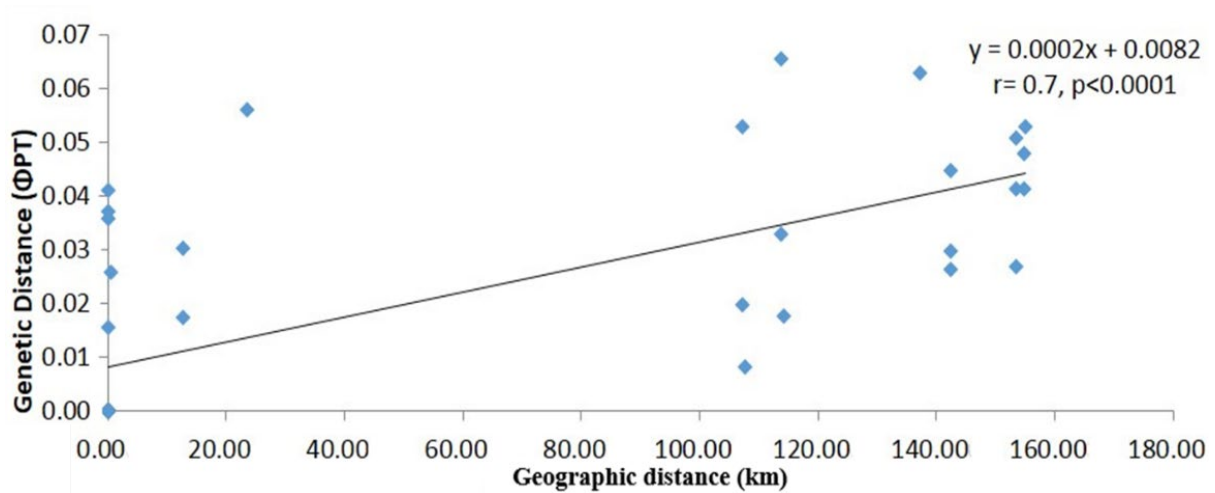

**Supplementary Fig.1** Mantel test to estimate correlation between genetic ( $\Phi_{PT}$ ) measured using AFLP markers and geographic distance (Km) of cultivated and wild enset samples, including the regression formula, accuracy ( $r$ ) and significance test ( $P$ ).

728

729

730
